# Supplementary material for: High throughput in vivo functional validation of candidate congenital heart disease genes in Drosophila
Source: eLife journal article supplement (doi:10.7554/elife.22617), 2017-01-13
Supplement: supp [file elife-22617-supp-v1.zip]

Figure 1-figure supplement 1

| <b>A</b>       | <b>Mortality Index</b> |                    |
|----------------|------------------------|--------------------|
|                | <b>Hand-Gal4</b>       | <b>4XHand-Gal4</b> |
| <b>Wds-IR</b>  | <b>7%</b>              | <b>100%</b>        |
| <b>Ssh-IR</b>  | <b>10%</b>             | <b>100%</b>        |
| <b>Mtt-IR</b>  | <b>8%</b>              | <b>65%</b>         |
| <b>Wibg-IR</b> | <b>8%</b>              | <b>63%</b>         |
| <b>Rump-IR</b> | <b>6%</b>              | <b>52%</b>         |
| <b>Trx-IR</b>  | <b>5%</b>              | <b>35%</b>         |
| <b>Twf-IR</b>  | <b>3%</b>              | <b>28%</b>         |
| <b>BicD-IR</b> | <b>0%</b>              | <b>22%</b>         |
