# Supplementary material for: High throughput in vivo functional validation of candidate congenital heart disease genes in Drosophila
Source: eLife. 2017 Jan 20;6:e22617. doi: 10.7554/eLife.22617 (PMC5300701; doi:10.7554/eLife.22617)
Supplement: Supplementary file 1. — Patient identification number, human gene, mutation type and category (DH, damaging mutation in gene with homolog expression high in embryonic day 14.5 mouse heart (emh); CH, mutation in phylogenetically conserved region of gene with homolog expression high in emh; NH, mutation in phylogenetically nonconserved region of gene with homolog expression high in emh; DL, damaging mutation in gene with homolog expression low in emh; CL, mutation in phylogenetically conserved region of gene with homolog expression low in emh; NL, mutation in phylogenetically nonconserved region of gene with homolog expression low in emh) are from (Zaidi et al., 2013). DOI: http://dx.doi.org/10.7554/eLife.22617.011 [file elife-22617-supp1.xlsx]

## Sheet: Sheet1
Supplementary file 1.
#	Patient ID	Human Gene	Mutation	Mutated AA	Conservation Score	Category	Drosophila Homolog	Protein Function	Mortality Index
1	1-02144	LIG1	Nonsense	Y765X	10	DH	DNA-ligI	DNA ligase	0
2	1-01360	NCKAP1	Nonsense	E1057X	9	DH	Hem	Protein binding	0
3	1-01028	GTPBP4	Nonsense	K332X	10	DH	Non1	GTP binding	0.47
4	1-00577	OS9	Frameshift	T158	1	DH	CG6766	Lectin	0.41
5	1-02227	FTSJ3	Frameshift	786/847	8	DH	CG8939	rRNA MT	0.01
6	1-01907	SERPINH1	Nonsense	R415X	1	DH	Spn28Dc	Serpin	0.16
7	1-00148	LAMC1	Missense	G170E	6	CH	LanB2	Laminin	0.02
8	1-00522	TLN1	Missense	L684V	8	CH	Rhea	Talin	0.51
9	1-01664	OBSCN	Missense	F5295S	4	CH	Unc-89	GEF	0.01
	1-03190		Missense	T4421M		NH
10	1-00522	LAMA5	Missense	C1625Y	7	CH	LanA	Laminin	0.05
11	1-00479	GANAB	Missense	N171S	10	CH	CG14476	Glucosidase	0
12	1-02394	DST	Missense	K2653I	7	CH	Shot	Protein binding	0.02
	1-02121			G2936D		NH
13	1-02189	EIF3H	Missense	H109R	8	CH	eIF-3P40	Translation	0.54
14	1-00753	FYCO1	Missense	E1286K	2	CH	Rbpn-5	GTPase binding	0
15	1-02153	RNF44	Missense	R421Q	5	CH	Mura	Ubiquitin transferase	0
16	1-00325	TSHZ1	Missense	Q288R	5	CH	Tio	Transcription	0.16
					5		Tsh		0
17	1-01026	RUFY2	Missense	P621L	9	CH	CG31064	Endosomal protein	0.45
18	1-00541	EFHD2	Missense	A230V	10	CH	Swip-1	Calcium binding	0
19	1-02923	PHIP	Missense	S674C	8	CH	BRWD3	Protein interactions	0.5
20	1-02264	C11orf9	Missense	F387S	7	CH	CG3328	DNA binding	0
21	1-02133	CPSF1	Missense	N29K	9	CH	Cpsf160	mRNA binding	0.96
22	1-02437	LZTR1	Missense	G248R	10	CH	CG3711	Transcription	0.01
23	1-01365	GTPBP1	Missense	E291K	10	CH	Dgp-1	GTPase	0
24	1-01341	KIAA0196	Missense	V167D	10	CH	CG12272	Endosomal protein	0.56
25	1-00587	SMAD4	Missense	I500V	8	CH	Med	DNA binding	0
26	1-00491	KPNA1	Missense	P350S	7	CH	Kap-alpha1	Transport	0
27	1-03300	DHX38	Missense	G332D	8	CH	l(1)G0007	Helicase	0.55
28	1-02788	MINK1	Missense	R299C	7	CH	Msn	Protein kinase	0.09
29	1-03300	NTM	Frameshift	204/344	6	DL	CG31646	Cell surface protein	0.16
30	1-01412	ODZ4	Missense	R1444K	6	CL	Ten-a	ECM protein	0.12
31	1-00381	COL4A3BP	Missense	G131D	9	CL	Cert	Ceramide binding	0
32	1-00373	PAPSS1	Missense	T399S	9	CL	Papss	Paps synthetase	0.59
33	1-02515	KCNH6	Missense	T274M	5	CL	Sei	Ion channel	0.19
34	1-00750	SSH2	Missense	V108L	5	CL	Ssh	Protein phosphatase	1
35	1-02955	XRCC5	Missense	K238Q	9	CL	Ku80	Helicase	0.04
36	1-01119	NAA16	Missense	R70C	9	CL	Nat1	Acetyltransferase	0.59
37	1-02461	DTNA	Missense	P295S	7	CL	Dyb	Cytoskeleton	0
38	1-01175	ITGA7	Missense	R279W	7	CL	Mew	Cell adhesion	0
39	1-00096	PIK3CD	Missense	L347V	10	CL	Pi3K92E	PI3 kinase	0.61
40	1-02364	NR6A1	Missense	C120R	6	CL	Hr4	Transcription factor	0.03
41	1-02126	BICD1	Missense	D760E	8	CL	BicD	Protein binding	0.22
42	1-03171	ALPL	Missense	A102T	7	CL	CG5656	Alkaline phosphatase	0.51
					7		CG10827		0
43	1-02107	RDH5	Missense	R280S	1	CL	Sni	Carbonyl reductase	0.09
44	1-00938	FGFR4	Missense	D297N	8	CL	Htl	FGFR	0.19
45	1-02527	GRM8	Missense	N778S	4	CL	Mtt	GPCR	0.65
46	1-01505	TTN	Missense	T4852N	4	NH	Bt	Protein kinase	0.05
47	1-00258	PFKM	Missense	A522G	10	NH	Pfk	Kinase	0
48	1-01432	LAMB2	Missense	R1661W	9	NH	LanB1	Laminin	0.04
49	1-00222	NUCB1	Missense	R189C	6	NH	NUCB1	Calcium binding	0.49
50	1-00381	STAB1	Missense	A1102V	1	NH	CG11377	Calcium binding	0.13
51	1-01933	CPD	Missense	P425R	8	NH	Svr	Carboxypeptidase	0
52	1-02141	LRPPRC	Missense	D486N	9	NH	Bsf	mRNA binding	0
53	1-00186	DSG2	Missense	L499Q	1	NH	CadN2	E-cadherin	0
54	1-01788	MYEF2	Missense	I264V	9	NH	Rump	RNA binding	0.52
55	1-02888	AP3B1	Missense	E771K	8	NH	Rb	Vesicle trafficking	0
56	1-00323	NUP62	Missense	Q70R	8	NH	Nup62	Nucleoporin	0.78
57	1-00465	TOMM40L	Missense	S171I	6	NH	Tomboy40	Transporter	0.03
					6		Tom40		0.96
58	1-00824	MAP2K7	Missense	V409I	7	NH	Hep	Protein kinase	0
59	1-02254	ELMO2	Missense	N332S	6	NH	Ced-12	Protein binding	0.03
60	1-01941	NOP2	Missense	I351V	7	NH	CG8545	Nucleolar protein	0.97
61	1-01997	PRPF4B	Missense	E14Q	8	NH	CG7028	Protein kinase	0.77
62	1-00305	GRIP2	Missense	T954M	4	NH	Grip	Receptor binding	0.51
63	1-02411	CDH23	Missense	R1136C	3	NL	Ds	Cadherin binding	0
64	1-01184	APLP1	Missense	R330C	5	NL	Appl	Protein binding	0.53
65	1-01538	MPI	Missense	A38V	10	NL	CG8417	Isomerase	0
66	1-02013	TFIP11	Missense	M432T	10	NL	Sip1	Nucleic acid binding	0.82
67	1-02772	TARS2	Missense	P155R	3	NL	Aats-thr	tRNA synthetase	0.72
68	1-00980	NCAPD3	Missense	A1041V	6	NL	Cap-D3	Chromatin binding	0.07
69	1-00482	NFATC2	Missense	D584A	5	NL	NFAT	Transcription	0.07
70	1-01795	DDX10	Missense	V427L	10	NL	CG5800	Helicase	0.64
71	1-00448	ITPR3	Missense	R1027H	5	NL	Itp-r83A	Calcium channel	0
72	1-01457	VPS13C	Missense	T423A	6	NL	Vps13	Protein sorting	0.16
73	1-01360	NEURL2	Missense	S92T	10	NL	CG3894	Ubiquitination	0.28
74	1-02020	WIBG	Missense	G203V	8	NL	Wibg	RNA binding	0.63
75	1-01621	TWF2	Missense	E185Q	7	NL	Twf	Actin binding	0.28
76	1-00230	BACH2	Missense	T803A	3	NL	Cnc	Transcription	0
77	1-00111	PPWD1	Missense	I190V	8	NL	CG3511	Isomerase	0.01
78	1-02265	PKN3	Missense	R255Q	5	NL	Pkn	Protein kinase	0.41
79	1-00982	CREB5	Missense	T236M	2	NL	Atf-2	Transcription	0.03
80	1-00293	HIVEP2	Missense	P123L	6	NL	Shn	Transcription	0
81	M007-20	SBNO2	Missense	V78M	6	NL	CG3491	DNA binding	0
82	1-00096	LPHN3	Missense	K1406R	5	NL	Cirl	GPCR	0.12
83	M007-20	MASTL	Missense	D537N	9	NL	Gwl	Protein kinase	0.03
84	1-00878	CRB2	Missense	R1189Q	4	NL	Crb	Cell polarity	0
85	1-00820	PABPC4L	Missense	K224Q	3	NL	pAbp	RNA binding	0.09
86	1-00818	C16orf48	Missense	A192T	5	NL	CG11125	Scaffold protein	0.37
87	1-00151	FAN1	Missense	T905M	7	NL	Sn	Actin binding	0.09
88	1-00312	USH1C	Missense	R875K	5	NL	CG5921	Spectrin binding	0.27
89	1-02070	NCKAP5	Missense	T1202I	1	NL	CG42663	Adapter protein	0.67
90	1-00305	CHIC1	Missense	R129H	8	NL	CG5938	GEF	0.01
91	1-02189	DDO	Missense	A107V	9	NL	CG12338	Oxidase	0.27
92	1-01536	ALS2CL	Missense	R129W	6	NL	CG7158	GEF	0.25
93	1-02123	UNC13C	Missense	R1182Q	4	NL	Unc-13	Exocytosis	0
94	M006-17	AIPL1	Missense	E195K	7	NL	CG1847	Protein interactions	0
95	1-00305	KCNJ15	Missense	T77I	3	NL	Irk2	Potassium channel	0.26
96	1-01970	ANKS1B	Missense	A67V	4	NL	CG4393	Protein binding	0
97	1-01847	RAB11FIP4	Missense	E138K	6	NL	Nuf	Microtubule binding	0.49
98	1-01371	DNAH9	Missense	R668W	10	NL	Dhc93AB	Dynein heavy chain	0
99	1-00728	FABP2	Missense	R11Q	2	NL	Fabp	Fatty acid binding	0.28
100	1-01866	ABCA13	Missense	E574Q	5	NL	CG34120	ATP binding	0.44
101	1-00522	GPR1	Missense	A293S	1	NL	AstC-R2	Allostatin receptor	0
102	1-01474	DMBX1	Missense	E140Q	2	NL	Repo	Transcription	0
103	1-00305	DNAJC5B	Missense	E22K	5	NL	Csp	Chaperone	0.33
104	1-01119	DSC1	Missense	V550D	1	NL	CadN	Protein binding	0.03
105	1-02696	KCNH5	Missense	N817S	8	NL	Eag	Potassium channel	0
106	1-02956	ASIC4	Missense	R593W	2	NL	Ppk7	Sodium channel	0
107	1-02458	PDCD1LG2	Missense	S36N	1	NL	Tutl	Cell adhesion	0
108	1-01951	ABCB6	Missense	A176G	10	NL	Hmt-1	ABC transporter	0.42
109	1-00596	MLL2	Frameshift	S1722	7	DH	Trx	Methyltransferase	0.35
110	1-00577	CUL3	Frameshift	I144	8	DH	Cul-3	Ubiquitin ligase	0.43
111	1-00534	CHD7	Nonsense	Q1599X	7	DH	Kismet	Helicase	0.54
112	1-00075	RNF20	Nonsense	Q83X	8	DH	Bre1	Ubiquitin ligase	0.13
113	1-00455	NAA15	Frameshift	D335	7	DH	Nat1	Acetyltransferase	0.59
	1-00141		Nonsense	S761X		DH
114	1-00448	NF1	Splice	Exon 6 (+4 bp)	9	DH	Nf1	GTPase activator	0.05
115	1-01965	KDM5B	Splice	Exon 12 (+1 bp)	7	CH	Lid	Demethylase	0
116	1-00230	KDM5A	Missense	R1508W	9	CH
117	1-00750	HUWE1	Missense	R3219C	9	CH	CG8184	Ubiquitin ligase	0
118	1-00116	NUB1	Missense	D310H	8	CH	CG5111	Ubiquitin associated	0.06
					8		CG15445		0
119	1-01828	DAPK3	Missense	P193L	1	CH	Drak	Protein kinase	0
120	1-03151	SUPT5H	Missense	E451D	9	CH	Spt5	Transcription	0.72
121	1-00197	BCL9	Missense	M1395K	1	CH	Lgs	Transcription	0
122	1-01138	USP34	Missense	L432P	9	CH	Puf	Ubiquitin protease	0.14
123	1-01151	SUV420H1	Missense	R143C	6	NH	Hmt4-20	Methyltransferase	0.16
124	1-01913	RAB10	Missense	N112S	9	NH	Rab10	GTPase	0.04
125	1-00638	FBN2	Missense	D2191N	2	NH	Frac	ECM protein	0.03
126	1-01451	MED20	Splice	Exon 2 (+2 bp)	8	DL	MED20	Transcription	0.01
127	1-02020	SMAD2	Splice	W244C	6	DL	Smox	Chromatin binding	0.07
	1-02621		Missense
128	1-00853	WDR5	Missense	K7Q	10	NL	Wds	Acetyltransferase	1
129	1-01907	UBE2B	Missense	R8T	8	NL	UbcD6	Ubiquitin ligase	0.84
130	1-01260	USP44	Missense	E71D	1	NL	Scny	Ubiquitin protease	0.25
131	1-00802	PTCH1	Missense	R831Q	9	NL	Ptc	Receptor	0.1
132	1-02458	SOS1	Missense	T266K	10	NL	Sos	GEF	0.11
133	1-02952	PITX2	Missense	A47V	8	NL	Ptx1	Transcription	0.5
134	1-02598	LRP2	Missense	E4372K	8	NL	Mgl	Receptor	0.03
