# Supplementary material for: High throughput in vivo functional validation of candidate congenital heart disease genes in Drosophila
Source: eLife. 2017 Jan 20;6:e22617. doi: 10.7554/eLife.22617 (PMC5300701; doi:10.7554/eLife.22617)
Supplement: Supplementary file 2. — Flies were obtained from either the Bloomington Drosophila Stock Center (BDSC) or the Vienna Drosophila Resource Center (VDRC). Individual fly lines are identified by source ID numbers. Both the human genes and their corresponding Drosophila homologs are listed. Each line carries an inhibitory RNA transgene designed to silence the indicated Drosophila gene, cloned downstream of a UAS DNA element. The RNAi transgene is only expressed in cells producing the yeast Gal4 transcription factor. DOI: http://dx.doi.org/10.7554/eLife.22617.012 [file elife-22617-supp2.xlsx]

## Sheet: Sheet1
Supplementary file 2.
#	Human Gene	Drosophila Homolog	Soruce	Source ID#
1	LIG1	DNA-ligI	BDSC	34564
			VDRC	106463
2	NCKAP1	Hem	BDSC	29406
			BDSC	41688
			VDRC	103380
3	GTPBP4	Non1	BDSC	31117
			VDRC	100270
4	OS9	CG6766	BDSC	42924
			VDRC	38035
5	FTSJ3	CG8939	VDRC	40726
6	SERPINH1	Spn28Dc	BDSC	34381
7	LAMC1	LanB2	VDRC	104013
			VDRC	42560
8	TLN1	Rhea	BDSC	32999
			BDSC	33913
9	OBSCN	Unc-89	BDSC	31538
			BDSC	31539
10	LAMA5	LanA	BDSC	28071
			VDRC	18873
11	GANAB	CG14476	BDSC	34334
			VDRC	48375
12	DST	Shot	BDSC	28336
			BDSC	41858
13	EIF3H	eIF-3P40	VDRC	36086
			VDRC	106189
14	FYCO1	Rbpn-5	BDSC	52996
15	RNF44	Mura	BDSC	35236
16	TSHZ1	Tio	BDSC	35812
		Tsh	BDSC	28022
17	RUFY2	CG31064	BDSC	60496
18	EFHD2	Swip-1	BDSC	31585
19	PHIP	BRWD3	BDSC	33421
20	C11orf9	CG3328	BDSC	55211
21	CPSF1	Cpsf160	BDSC	55698
22	LZTR1	CG3711	BDSC	33422
23	GTPBP1	Dgp-1	VDRC	27490
			VDRC	27493
24	KIAA0196	CG12272	BDSC	51906
25	SMAD4	Med	BDSC	31928
26	KPNA1	Kap-alpha1	BDSC	27523
27	DHX38	l(1)G0007	BDSC	57153
28	MINK1	Msn	BDSC	28791
			BDSC	42518
			VDRC	101517
29	NTM	CG31646	BDSC	28654
30	ODZ4	Ten-a	BDSC	29439
31	COL4A3BP	Cert	BDSC	60080
32	PAPSS1	Papss	BDSC	60079
33	KCNH6	Sei	BDSC	31682
34	SSH2	Ssh	BDSC	38948
35	XRCC5	Ku80	BDSC	27710
36	NAA16	Nat1	BDSC	32357
37	DTNA	Dyb	BDSC	32935
38	ITGA7	Mew	BDSC	44553
39	PIK3CD	Pi3K92E	BDSC	61182
40	NR6A1	Hr4	BDSC	54803
41	BICD1	BicD	BDSC	35405
42	ALPL	CG5656	BDSC	58334
		CG10827	BDSC	57526
43	RDH5	Sni	BDSC	31978
44	FGFR4	Htl	BDSC	58289
45	GRM8	Mtt	BDSC	44076
46	TTN	Bt	BDSC	31546
47	PFKM	Pfk	BDSC	34336
48	LAMB2	LanB1	BDSC	42616
49	NUCB1	NUCB1	BDSC	44019
50	STAB1	CG11377	BDSC	51741
51	CPD	Svr	BDSC	44487
52	LRPPRC	Bsf	BDSC	34550
53	DSG2	CadN2	BDSC	38207
54	MYEF2	Rump	BDSC	42665
55	AP3B1	Rb	BDSC	28668
56	NUP62	Nup62	BDSC	52927
57	TOMM40L	Tomboy40	BDSC	29573
		Tom40	BDSC	26005
58	MAP2K7	Hep	BDSC	28710
59	ELMO2	Ced-12	BDSC	36097
60	NOP2	CG8545	BDSC	56998
61	PRPF4B	CG7028	BDSC	55640
62	GRIP2	Grip	BDSC	40930
63	CDH23	Ds	BDSC	28008
64	APLP1	Appl	BDSC	39013
65	MPI	CG8417	BDSC	34379
66	TFIP11	Sip1	BDSC	56933
67	TARS2	Aats-thr	BDSC	42902
68	NCAPD3	Cap-D3	BDSC	61979
69	NFATC2	NFAT	BDSC	51422
70	DDX10	CG5800	BDSC	43206
71	ITPR3	Itp-r83A	BDSC	51686
72	VPS13C	Vps13	BDSC	42625
73	NEURL2	CG3894	BDSC	42618
74	WIBG	Wibg	BDSC	36096
75	TWF2	Twf	BDSC	57375
76	BACH2	Cnc	BDSC	32863
77	PPWD1	CG3511	BDSC	50597
78	PKN3	Pkn	BDSC	57804
79	CREB5	Atf-2	BDSC	33379
80	HIVEP2	Shn	BDSC	34689
81	SBNO2	CG3491	BDSC	57556
82	LPHN3	Cirl	BDSC	34821
83	MASTL	Gwl	BDSC	34525
84	CRB2	Crb	BDSC	38903
85	PABPC4L	pAbp	BDSC	60473
86	C16orf48	CG11125	BDSC	58164
87	FAN1	Sn	BDSC	42615
88	USH1C	CG5921	BDSC	61859
89	NCKAP5	CG42663	BDSC	54808
90	CHIC1	CG5938	BDSC	55613
91	DDO	CG12338	BDSC	57779
92	ALS2CL	CG7158	BDSC	28533
93	UNC13C	Unc-13	BDSC	29548
94	AIPL1	CG1847	BDSC	44490
95	KCNJ15	Irk2	BDSC	41981
96	ANKS1B	CG4393	BDSC	58087
97	RAB11FIP4	Nuf	BDSC	44035
98	DNAH9	Dhc93AB	BDSC	51511
99	FABP2	Fabp	BDSC	34685
100	ABCA13	CG34120	BDSC	34596
101	GPR1	AstC-R2	BDSC	36888
102	DMBX1	Repo	BDSC	50735
103	DNAJC5B	Csp	BDSC	33645
104	DSC1	CadN	BDSC	27503
105	KCNH5	Eag	BDSC	31679
106	ASIC4	Ppk7	BDSC	31878
107	PDCD1LG2	Tutl	BDSC	54850
108	ABCB6	Hmt-1	BDSC	53284
109	MLL2	Trx	BDSC	31092
			BDSC	33703
110	CUL3	Cul-3	BDSC	28899
			BDSC	36684
111	CHD7	Kismet	VDRC	46685
			VDRC	10762
112	RNF20	Bre1	BDSC	31351
			BDSC	35443
113	NAA15	Nat1	BDSC	34990
			VDRC	17571
114	NF1	Nf1	BDSC	25845
			BDSC	31466
115	KDM5B	Lid	BDSC	28944
116	KDM5A		BDSC	36652
117	HUWE1	CG8184	BDSC	36715
			VDRC	26935
118	NUB1	CG5111	VDRC	28642
			VDRC	28643
119	DAPK3	Drak	BDSC	55904
120	SUPT5H	Spt5	BDSC	34837
			VDRC	106814
121	BCL9	Lgs	BDSC	37476
			BDSC	41983
122	USP34	Puf	VDRC	106192
			VDRC	27517
123	SUV420H1	Hmt4-20	BDSC	32892
			BDSC	36639
124	RAB10	Rab10	BDSC	26289
			VDRC	101454
125	FBN2	Frac	BDSC	31578
126	MED20	MED20	BDSC	34577
			VDRC	52483
127	SMAD2	Smox	BDSC	43138
			BDSC	41670
128	WDR5	Wds	BDSC	32952
			BDSC	60399
129	UBE2B	UbcD6	BDSC	35476
			BDSC	42631
130	USP44	Scny	BDSC	40877
131	PTCH1	Ptc	BDSC	28795
			BDSC	44612
132	SOS1	Sos	BDSC	34833
			BDSC	31597
133	PITX2	Ptx1	VDRC	107785
			VDRC	19830
134	LRP2	Mgl	BDSC	29324
