# Supplementary material for: High throughput in vivo functional validation of candidate congenital heart disease genes in Drosophila
Source: eLife. 2017 Jan 20;6:e22617. doi: 10.7554/eLife.22617 (PMC5300701; doi:10.7554/eLife.22617)
Supplement: Supplementary file 3. — DOI: http://dx.doi.org/10.7554/eLife.22617.013 [file elife-22617-supp3.xlsx]

## Sheet: Sheet1
Supplementary file 3.
#	Gene	Forward	Reverse
1	Gal4	5’-CTCTCCCAAAACCAAAAGGTCTC-3’	5’-GCCAATCTATCTGTGACGGCATC-3’
2	CG8184	5’-TCGTAGAGATAAGGGCGGCAGTTC-3’	5’-CAAAGAGAAAAGCGAGGTGGC-3’
3	Lid	5’-GAGAGCCTCCAGCACTTATCGTAG-3’	5’-CAAAACCAAACGCCTCCTGC-3’
4	Cul-3	5’-TTTATCCCTTGGCGGTGTGGAG-3’	5’-CGGTTCCCATTTGTGGCTGTAAC-3’
5	Scny	5’-AATACGAGGAGGTGCCCAACTAC-3’	5’-TGGTGCGACTGATTGTTCGG-3’
6	Bre1	5’-AACCCTGAAGGAGGTGGAGAAG-3’	5’-GACTCGTTGTAGAGCACGGAAAAC-3’
7	Rab10	5’-AGCGTTCCGTTGCGTTTTGG-3’	5’-TCTTCTCCACATCCTCGTTGGC-3’
8	Med20	5’-TTCTGGTGGACTGCGAAACG-3’	5’-GGTGAAGGTGTTGGTCATCTTGAG-3’
9	CG15445	5’-TAAAGCGTCCGAGCGTGCTATG-3’	5’-CCAGTAAGTTCGTCCGATTCTGTC-3’
10	Gapdh	5’-TGAAAAGACAGCAGGAACTCAGC-3’	5’-AACGGTGCCCTTGAAACGAC-3’
