# Supplementary figures and images for: High throughput in vivo functional validation of candidate congenital heart disease genes in Drosophila
Source: eLife journal article supplement (doi:10.7554/elife.22617), 2017-01-13

Figure 4-figure supplement 1

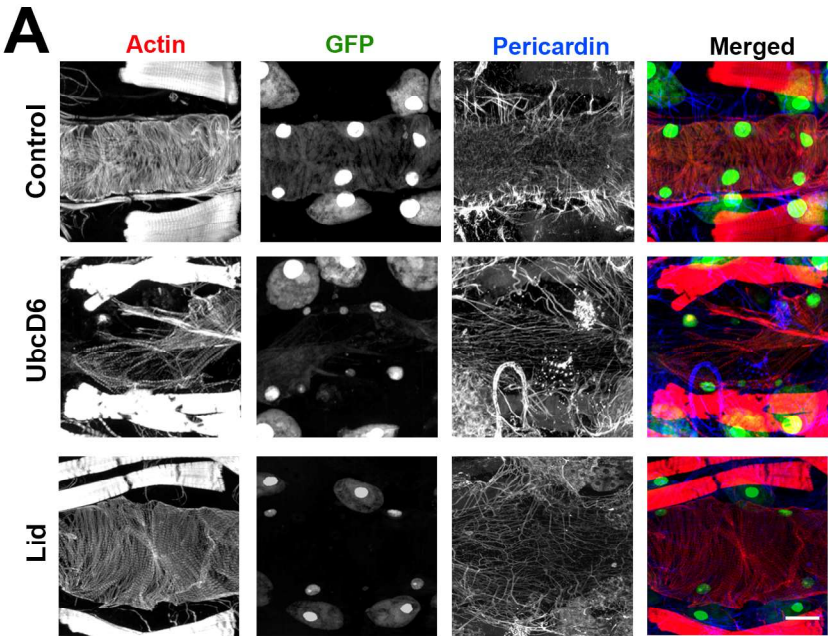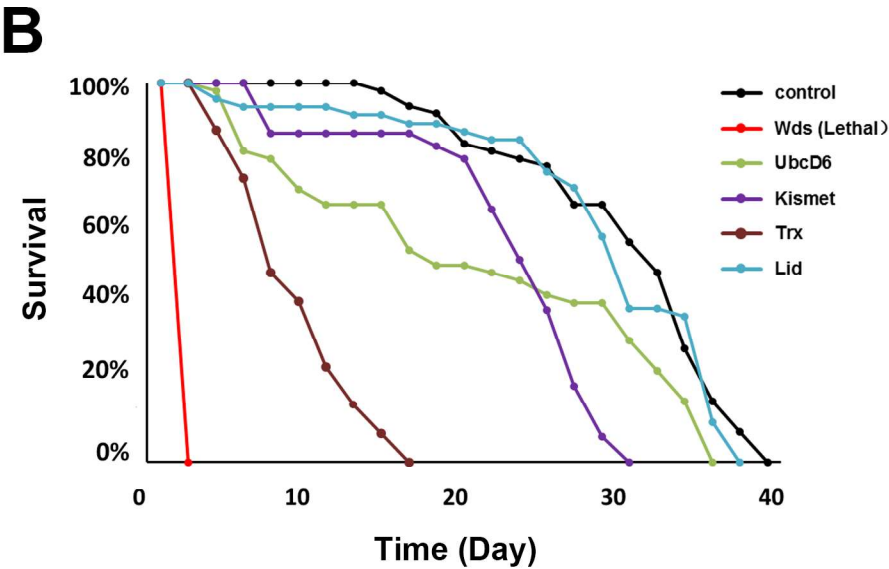

Supplement: supp [file elife-22617-supp-v1.zip]
